# Supplementary material
Source: PubMed Central journal article supplement (PMC8328214)
Supplement: supplementary_materials_r2_bhab084.pdf [file supplementary_materials_r2_bhab084.pdf]

# A distinct population of L6 neurons in mouse V1 mediate cross-callosal communication

Yajie Liang<sup>1,5</sup>, Jiang Lan Fan<sup>3</sup>, Wenzhi Sun<sup>1,4,6</sup>, Rongwen Lu<sup>1,7</sup>, Ming Chen<sup>4</sup>, and Na Ji<sup>1,2</sup>

<sup>1</sup>Janelia Research Campus, Howard Hughes Medical Institute, Ashburn, Virginia, USA, <sup>2</sup>Department of Physics, Department of Molecular and Cell Biology, Helen Wills Neuroscience Institute, University of California, Berkeley, California, USA, <sup>3</sup>UCSF-UC Berkeley Joint PhD Program in Bioengineering, University of California, Berkeley, California, USA, <sup>4</sup>iHuman Institute, ShanghaiTech University, Shanghai, China, <sup>5</sup>Current address: Department of Diagnostic Radiology and Nuclear Medicine, University of Maryland, Baltimore, Maryland, USA, <sup>6</sup>Current address: Chinese Institute for Brain Research, Beijing, China, <sup>7</sup>Current address: National Eye Institute, National Institutes of Health, Bethesda, Maryland, USA

\*Correspondence author:

Na Ji, Ph.D.

Associate Professor

Helen Wills Neuroscience Institute

Department of Physics

Department of Molecular Cell Biology

University of California, Berkeley

Email: [jina@berkeley.edu](mailto:jina@berkeley.edu)

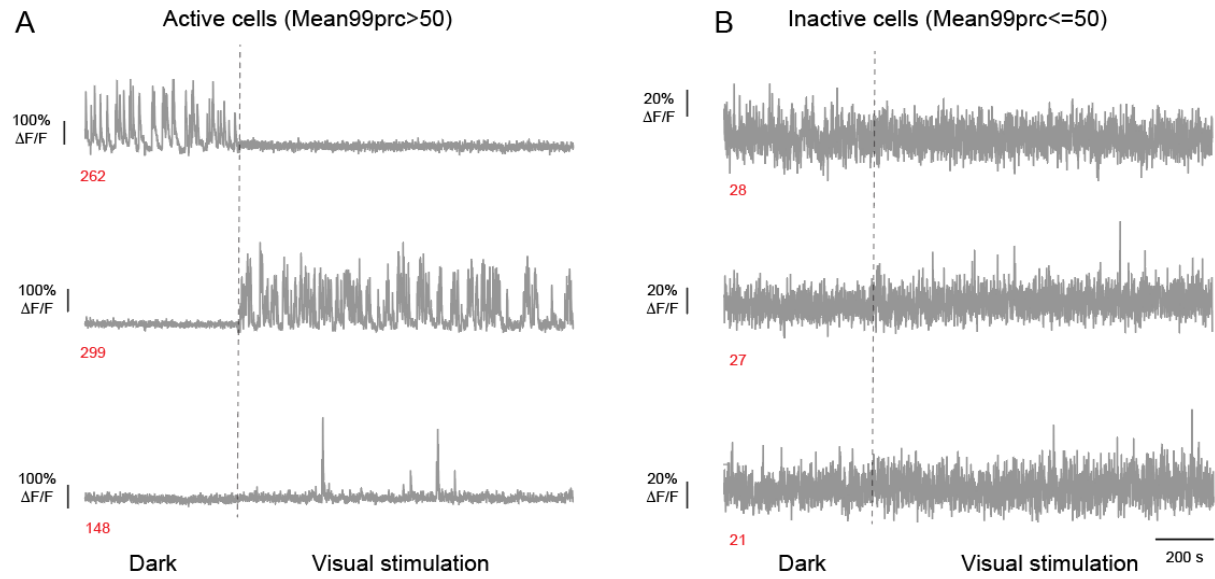

**Supplementary Figure 1.  $\Delta F/F$  traces of example CP neurons that pass (A) or do not pass (B) our criterion for active neurons.** Dashed vertical lines indicate the transition from the dark to grating stimulation. Numbers in red are “Mean99prc”, the mean of the  $\Delta F/F$  values that were 99% or above in the  $\Delta F/F$  value distribution during an imaging session.

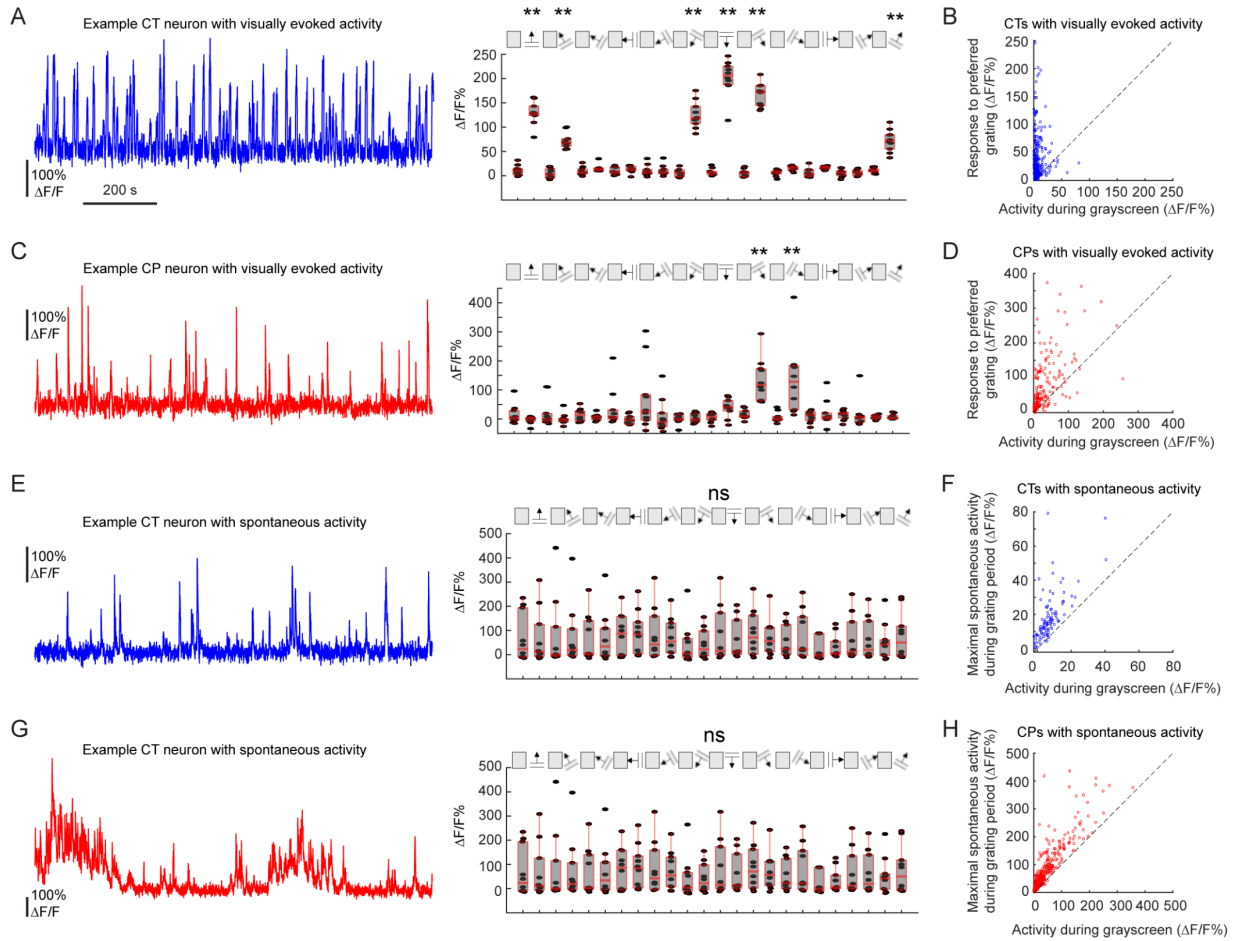

**Supplementary Figure 2. CT and CP cells with visually evoked or spontaneous activity during grating stimulation.** Example CT (A) and CP (C) neurons with visually evoked activity. (Left) temporal course of calcium transients and (Right) trial-averaged  $\Delta F/F$  for 12 drifting gratings and inter-stimulus gray screens. Neurons with visually evoked activity have  $p < 0.01$  (\*\*) for paired t-test on the calcium transients measured during drifting grating stimulus and during the preceding gray screen. (B, D) Scatter plots showing the trial-averaged response to preferred grating stimulus and the averaged response measured during gray screen for CT (B, 358 cells, 2 mice) and CP (D, 225 cells, 5 mice) neurons with visually evoked activity. Example CT (E) and CP (G) neurons with spontaneous activity. (Left) temporal course of calcium transients and (Right) trial-averaged  $\Delta F/F$  for 12 drifting gratings and inter-stimulus gray screen. Neurons with spontaneous activity have statistically similar calcium transients measured during drifting grating stimulus and during the preceding gray screen. ns: not significant. (F, H) Scatter plots showing the trial-averaged maximal spontaneous responses measured during grating stimuli and the averaged response measured during gray screens for CT (F, 102 cells, 2 mice) and CP (H, 653 cells, 5 mice) neurons with spontaneous activity.

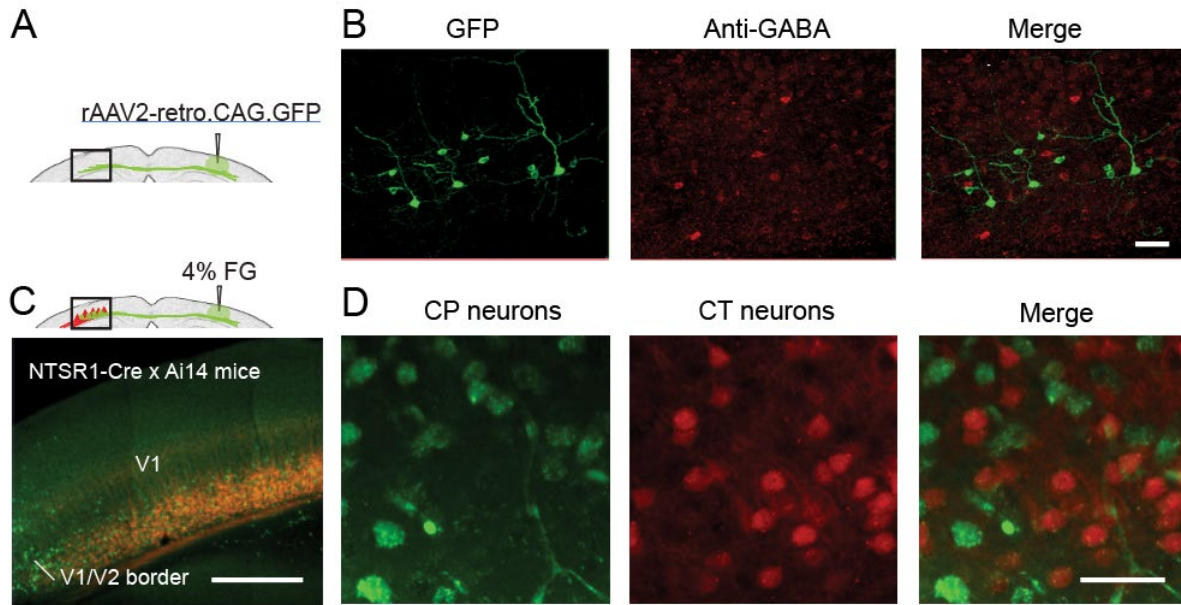

**Supplementary Figure 3. GABA immunostaining of L6 and retrograde tracing of callosal projection neurons in V1 by 4% FG.** (A) CP neurons were labeled by contralateral injection of rAAV2-retro.syn.GFP. (B) Coronal brain sections immunostained with anti-GABA (in red) showed that L6 CP neurons were not immunoreactive to anti-GABA. (C) 4% FG was injected into the right V1 of NTSR1-Cre  $\times$  Ai14 mice where CT neurons expressed tdTomato. FG<sup>+</sup> (green) cells were found in L6 of the left V1. (D) No colocalization was found between FG<sup>+</sup> cells (green) and CT neurons (red). Scale bars: 50  $\mu$ m in (B, D), 500  $\mu$ m in (C).

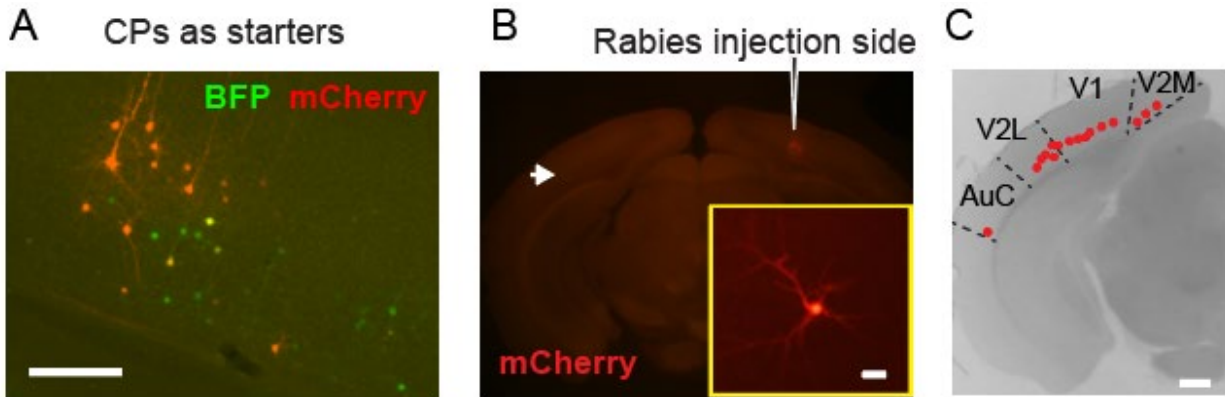

**Supplementary Figure 4. Monosynaptic connections between L6 CP neurons across hemispheres.** (A) Example coronal image of the rabies injection site with CP neurons as starter cells. (B) Example coronal image showing a presynaptic cell (arrow) contralateral to the injection site. Inset: a magnified image of the cell. (C) The locations of all presynaptic CP neurons (16 cells from 6 mice) contralateral to the injection site. Each red dot represents a cell. Scale bars: 200  $\mu\text{m}$  in (A), 500  $\mu\text{m}$  in (B, C).

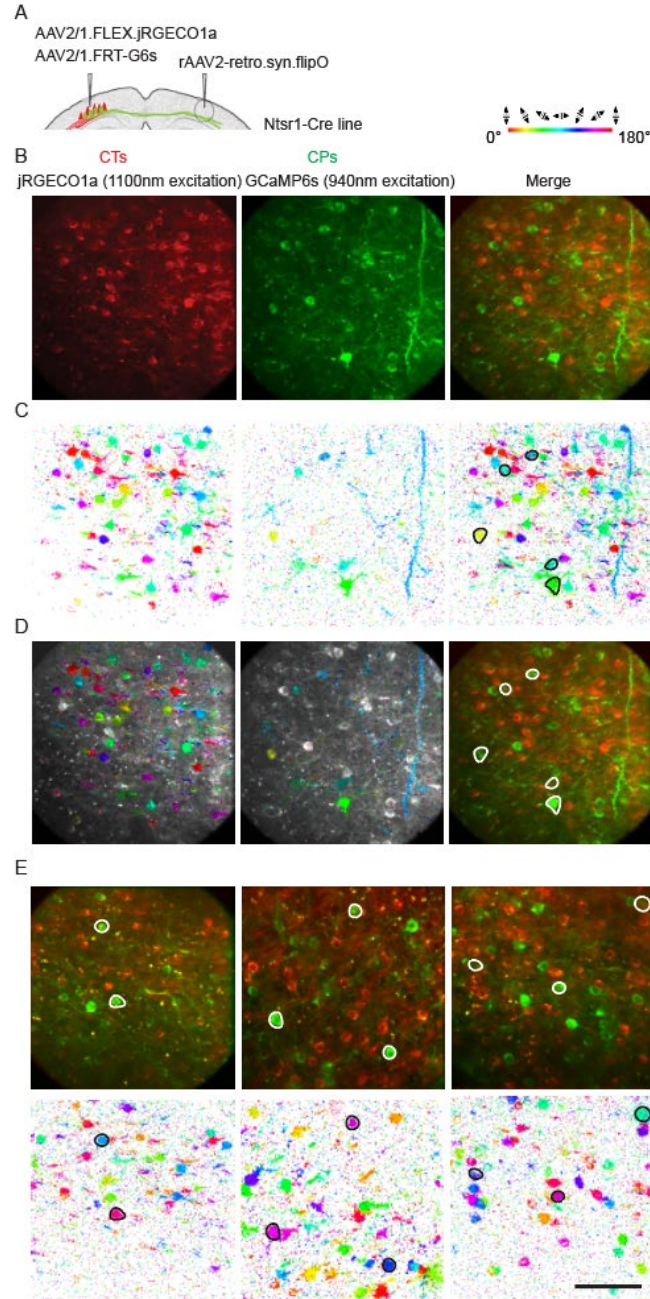

**Supplementary Figure 5. Simultaneous *in vivo* calcium imaging of CP and CT neurons and their tuning maps. (A)** Viral labeling strategy in NTSR1-Cre mice: CP neurons were labeled by contralateral injection of rAAV2-retro.syn.FLPo and ipsilateral injection of AAV2/1.FRT.GCaMP6s. CT neurons were labeled by ipsilateral injection of AAV2/1.syn.FLEX.jRGECO1a. **(B)** Example *in vivo* two-photon excitation fluorescence images of L6 CT (red, jRGECO1a<sup>+</sup>) and CP (green, GCaMP6s<sup>+</sup>) neurons in the same FOV. Orientation selectivity test was performed separately on CP neurons (at 940 nm excitation for GCaMP6s) and on CT neurons (at 1100 nm excitation for jRGECO1a). **(C)** Preferred orientation map of CP and CT neurons in (B) with each pixel color-coded by its preferred orientations. In the rightmost merged turning maps, OS CP neurons are outlined in black. **(D)** Overlap of fluorescence images and turning maps. In the rightmost merged fluorescence images, OS CP neurons are outlined in white. **(E)** Additional FOVs with merged channels and tuning maps. Scale bar, 100  $\mu\text{m}$ .



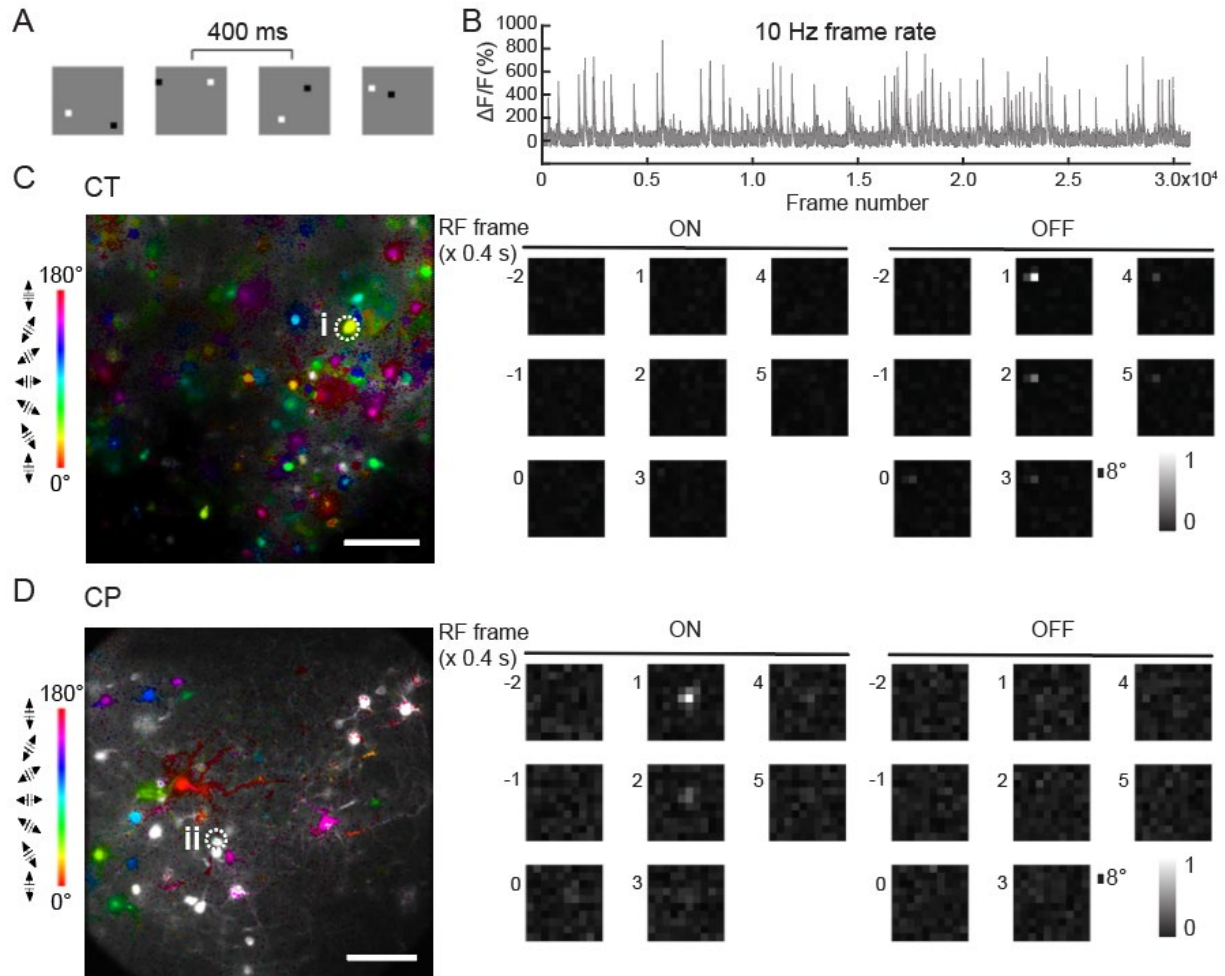

**Supplementary Figure 6. Receptive field mapping for CT and CP neurons.** (A) Receptive field (RF) mapping using sparse-noise stimuli of a pair of white (“ON” stimulus) and black (“OFF” stimulus) squares randomly distributed on a gray background presented 400 ms apart. (B) Example calcium transient ( $\Delta F/F\%$ ) trace from a CP neuron. (C, D) Spatiotemporal RFs of an example L6 CT (C, ROI i) and CP (D, ROI ii) neurons, respectively. Left panels: orientation tuning maps; Right panels: “ON” and “OFF” RFs from 0.8 sec before to 2 sec after the start of visual stimulus (“0”). Scale bar: 100  $\mu\text{m}$  in (C, D).

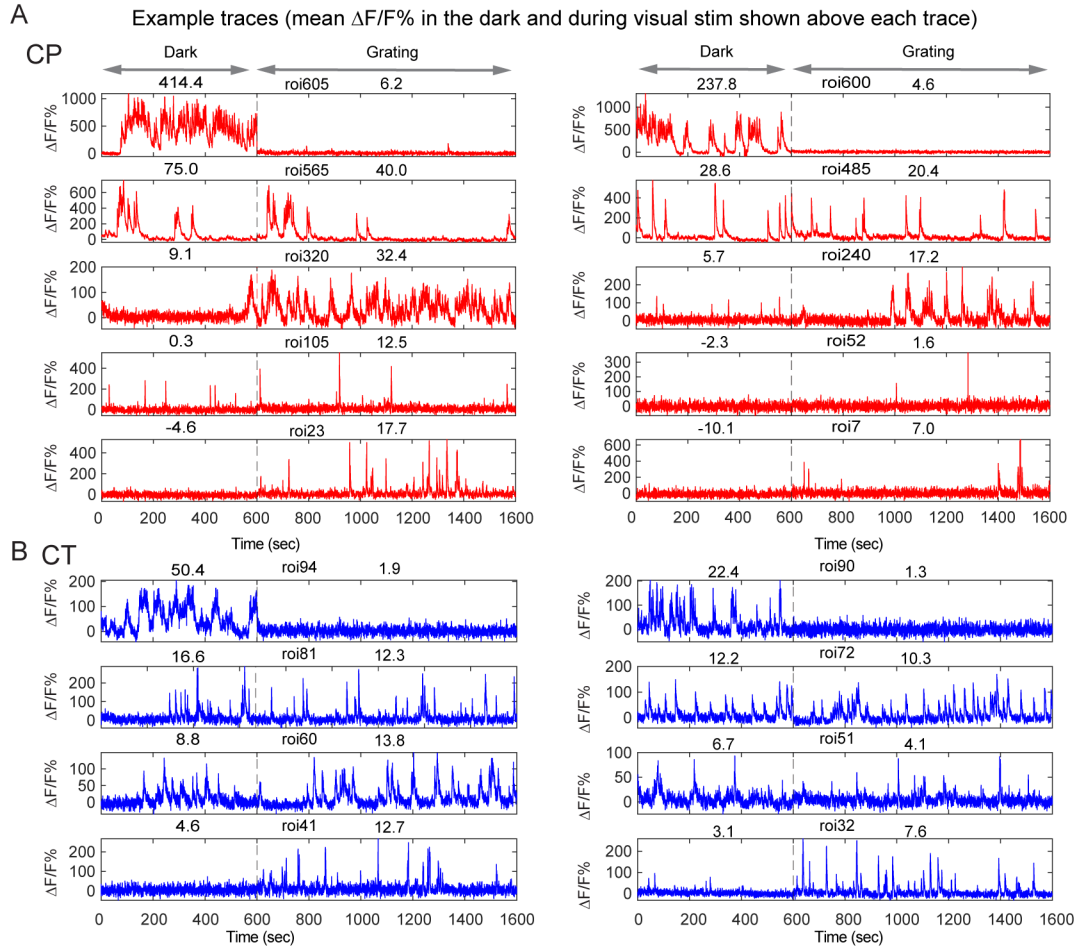

**Supplementary Figure 7. Example  $\Delta F/F\%$  traces of CP (A) or CT (B) neurons that were spontaneous active both in the dark and during grating stimulation. Vertical lines mark the transition from being in the dark to grating stimulation. Numbers above each trace show the mean  $\Delta F/F\%$  values in the dark and under grating stimulation, respectively.**
